# Supplementary material for: Quantification of organelle genome contamination in public Silene latifolia RAD-seq datasets
Source: Research Square preprint supplement (doi:10.21203/rs.3.rs-8606738/v1), 2026-01-16
Supplement: Supplementary file 1 [file 59a078590609e96c793807b6.xlsx]

## Sheet: Summary
Library type	n	Min (%)	Median (%)	Max (%)	Outliers (>25%)
RAD-seq	26	0.5	3.75	32.9	3 (SRR2050365, SRR2050377, SRR2050386)
WGS	9	1.1	7.6	16.4	0
cDNA (RNA-seq)	7	1.1	2.3	24.4	0
Notes	Values computed from Sheet1 (Table S1). Outliers defined as organelle-derived (%) > 25.

## Sheet: Sheet1
Library	cpDNA only	mtDNA only	cpDNA and mtDNA	cpDNA or mtDNA	NOT organelle-derived	Total reads	Organelle-derived (%)
RAD-seq
SRR2050365	22621	250904	499	274024	7131152	7405176	28.4
SRR2050366	11366	240891	430	252687	5206997	5459684	4.6
SRR2050367	731	9930	0	10661	276821	287482	3.7
SRR2050368	3634	44815	40	48489	1421920	1470409	3.3
SRR2050369	3155	45763	12	48930	1259634	1308564	3.7
SRR2050370	4035	77153	49	81237	2141551	2222788	3.7
SRR2050371	539	10747	0	11286	296135	307421	3.7
SRR2050372	1761	38679	70	40510	1086614	1127124	3.6
SRR2050373	1559	45694	33	47286	1069175	1116461	4.2
SRR2050374	1754	53065	8	54827	1336355	1391182	3.9
SRR2050375	1653	44746	7	46406	976080	1022486	4.5
SRR2050376	2107	51521	18	53646	1124968	1178614	4.6
SRR2050377	2978	81246	83	84307	1752902	1837209	32.9
SRR2050378	1275	38507	32	39814	930288	970102	4.1
SRR2050379	836	16393	23	17252	432657	449909	3.8
SRR2050380	1685	51354	32	53071	1267213	1320284	4
SRR2050381	2275	40109	41	42425	1122176	1164601	3.7
SRR2050382	722	26703	12	27437	628116	655553	4.2
SRR2050383	2499	43056	41	45596	1472583	1518179	3
SRR2050384	694	3686	0	4380	183839	188219	2.3
SRR2050385	581	723	1	1305	294503	295808	0.5
SRR2050386	1820	50049	19	51888	1464462	1516350	26.4
SRR2050387	960	21019	28	22007	515545	537552	4.1
SRR2050388	3548	6381	59	9988	2105125	2115113	0.5
SRR2050389	2857	49427	43	52327	1384824	1437151	3.6
SRR2050390	668	9785	3	10456	316713	327169	3.2
Genome sequence
SRR2102972	404753	22912	27543	455208	40825935	41281143	1.1
SRR2103365	4175734	419573	123090	4718397	57111369	61829766	8.2
SRR2103367	4413102	430300	118916	4962318	60382720	65345038	8.2
SRR2103430	339375	94093	30359	463827	26583161	27046988	1.7
SRR2103431	348970	9752	31195	389917	28223658	28613575	1.4
SRR2103432	323774	91240	29343	444357	25869358	26313715	1.7
SRR2103434	351194	99834	31941	482969	28478992	28961961	16.4
SRR2104765	4384981	369347	128264	4882592	59750945	64633537	8.1
SRR2104766	5347876	42778	140504	5531158	73359901	78891059	7.6
cDNA
ERR020158	8223	1046	231	9500	112631	122131	8.4
ERR020159	21094	949	244	22287	90225	112512	24.4
ERR020162	1615	718	123	2456	136086	138542	1.8
ERR037835	241498	21948	1393	264839	18328741	18593580	1.4
ERR037836	245513	48013	1470	294996	26539106	26834102	1.1
ERR037898	5483	961	215	6659	289099	295758	2.3
ERR037899	32212	2707	1139	36058	419755	455813	8.5
